# Supplementary material for: Integrated High-Throughput Sequencing, Microarray Hybridization and Degradome Analysis Uncovers MicroRNA-Mediated Resistance Responses of Maize to Pathogen Curvularia lunata
Source: MDPI journal article supplement (doi:10.3390/ijms232214038), 2022-11-14

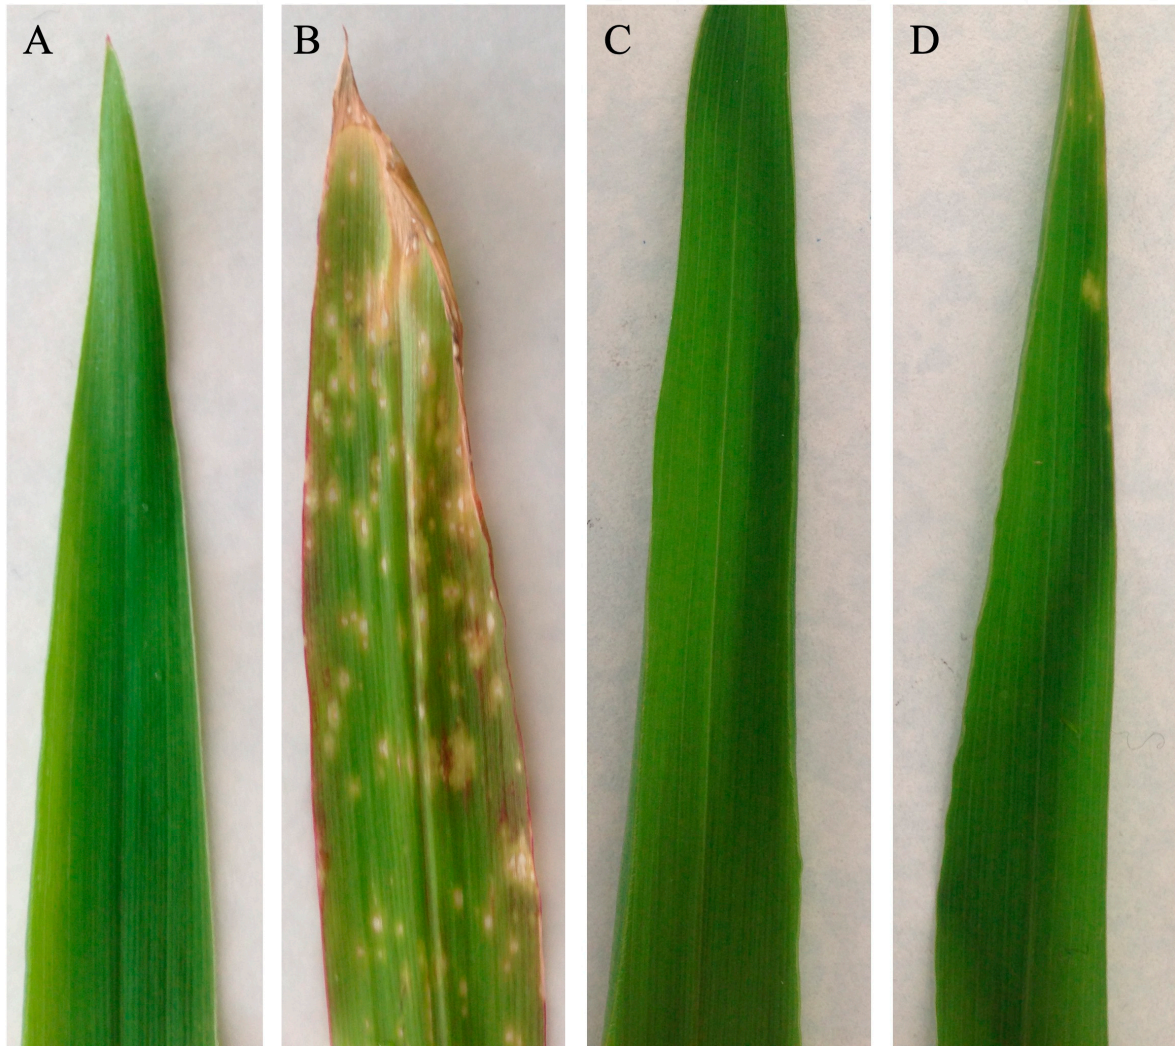

**Figure S1.** Symptom of *C. lunata* on the susceptible variety HZ and variety cultivar LY. (A) HZ not inoculated by *C. lunata*. (B) HZ inoculated by *C. lunata*. (C) LY not inoculated by *C. lunata*. (D) LY inoculated by *C. lunata*.



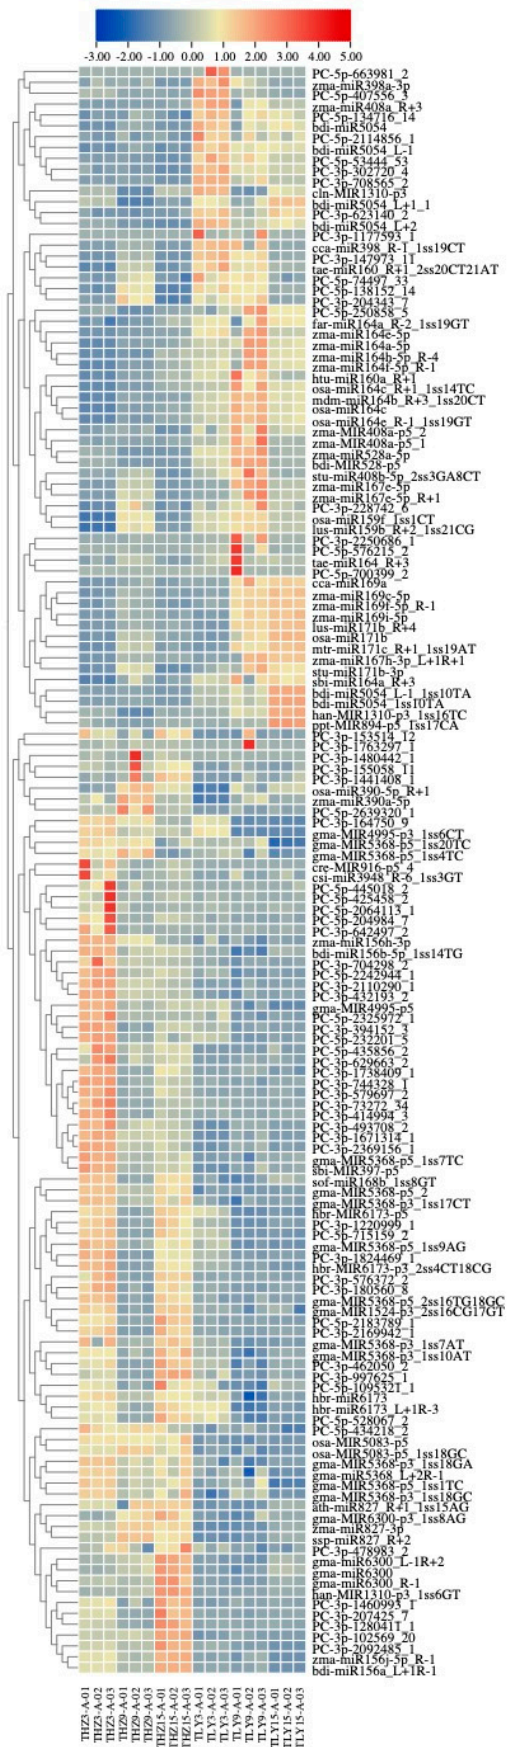

Supplement: s1 [file s1]
